# Supplementary material for: Neural Network based Prediction on Equation of State with Physical Constraints
Source: Research Square preprint supplement (doi:10.21203/rs.3.rs-5350620/v1), 2025-04-25
Supplement: Supplementary file 1 [file 72204e684adc5ce2bf05baa9.xlsx]

## Sheet: STable D1
Supplementary Table D1. Equation of state parameters learned for each fold in the 5-fold cross-validation (5CV) experiments (refer to Figure 3 and Section "Supervised Joint Learning with P-V-T-E Data" in the main text). *Equation of state parameters were obtained with EOSFit7 software (Gonzalez-Platas et al. 2016). aIn fold4, γ was refined to a negative value, we fixed γ to 1.1 in the fitting.
Parameters	Fold 1	Fold 2	Fold 3	Fold 4	Fold 5
Mie-Grüneisen-Debye + 3rd-order Birch-Murnaghan equation*
V0 (cm3 mol-1)	3.4662	3.3376	3.4808	3.4853	3.4524
K0 (GPa)	433.645	520.04	426.273	421.805	435.869
K0'	3.5905	3.6457	3.6008	3.6066	3.6033
θ0 (K)	4645.1	298	5481.16	4662.21	3204.99
γ	1.2267	1.0468	1.2056	1.1000a	1.2669
q	0.8644	0.4171	0.5883	0.6271	1.1276
Mie-Grüneisen-Debye + Vinet equation*
V0 (cm3 mol-1)	3.4694	3.319	3.4858	3.4915	3.4595
K0 (GPa)	421.772	512.403	413.745	405.441	420.452
K0'	3.8141	3.2806	3.8311	3.8631	3.8518
θ0 (K)	4504.5	298	5356.28	3989.07	3179.74
γ	1.2277	1.0533	1.2075	1.0355	1.274
q	0.8716	0.4775	0.6153	0.5645	1.1272

## Sheet: STable D2
Supplementary Table D2. Predicted pressure values by semi-empirical/empirical equations of state in the 5-fold cross-validation (5CV) experiments (refer to Figure 3 and Section "Supervised Joint Learning with P-V-T-E Data" in the main text). The values were calculated using EOSFit7 software (Gonzalez-Platas et al. 2016).
	Benedict et al. 2014	Mie-Grüneisen-Debye + Birch-Murnaghan	Mie-Grüneisen-Debye +Vinet
	P_true (GPa)	P_predict (GPa)	P_predict (GPa)
Fold1	112.544	111.346	111.039
	313.087	313.209	313.251
	476.768	477.123	477.398
	297.309	296.323	296.318
Fold2	239.035	249.866	227.895
	392.974	420.696	372.955
	322.163	343.089	313.522
	673.838	743.723	639.526
Fold3	433.475	434.797	434.882
	855.824	857.578	856.346
	46.7496	45.76	45.966
	627.306	632.2	632.006
Fold4	597.562	596.153	596.063
	544.258	541.488	541.901
	247.12	246.414	246.457
	156.022	151.523	150.248
Fold5	304.018	305.122	305.053
	92.6222	95.204	95.232
	68.1514	73.766	74.192
	203.093	204.827	204.551

## Sheet: STable D3
Supplementary Table D3. Root mean square error of pressure (RMSE-P) and energy (RMSE-E) in 5-fold cross-validation (5CV) experiments (refer to Figure 3 and "Section Supervised Joint Learning with P-V-T-E Data" in the main text).
Methods	Parameters	Fold 1	Fold 2	Fold 3	Fold 4	Fold 5	Mean	Std. Dev.
Polynomial Regression + Neural Network (PR + NN)
EOSNN	RMSE-P (GPa)	4.86295	14.4263	21.3569	11.9359	2.06837	10.9301	6.88905
	RMSE-E (eV/atom)	0.0720434	0.047674	0.387771	0.089999	0.0535115	0.1302	0.12964
PR (d = 1) + EOSNN	RMSE-P (GPa)	4.29096	7.68114	41.424	13.6012	9.84942	15.3693	13.3737
	RMSE-E (eV/atom)	0.045088	0.184893	0.100913	0.125401	0.0759972	0.106459	0.0474043
PR (d = 2) + EOSNN	RMSE-P (GPa)	2.86692	15.9197	18.2581	19.6157	4.94178	12.3204	7.0035
	RMSE-E (eV/atom)	0.0317896	0.0915817	0.0872351	0.174452	0.0629724	0.0896061	0.0474561
PR (d = 3) + EOSNN	RMSE-P (GPa)	4.47463	2.56459	6.27471	10.6986	15.6414	7.93078	4.70315
	RMSE-E (eV/atom)	0.0194139	0.0193623	0.127538	0.0332319	0.126106	0.0651304	0.050626
PR (d = 4) + EOSNN	RMSE-P (GPa)	8.07438	12.3412	95.876	8.12437	63.3759	37.5584	35.8861
	RMSE-E (eV/atom)	0.00781822	0.0159078	0.152094	0.033018	0.139952	0.0697581	0.0629169
PR + Gaussian Process (GP)
GP	RMSE-P (GPa)	143.491	177.887	344.952	193.715	247.618	221.533	70.2594
	RMSE-E (eV/atom)	1.00562	1.00289	2.32731	0.822789	1.20933	1.27359	0.540882
PR (d = 1) + GP	RMSE-P (GPa)	185.17	23.0867	108.056	104.722	88.7877	101.964	51.6975
	RMSE-E (eV/atom)	0.147478	0.340928	0.934817	0.214582	0.592262	0.446013	0.287766
PR (d = 2) + GP	RMSE-P (GPa)	13.7179	14.1477	25.7831	26.7298	14.3487	18.9454	5.9804
	RMSE-E (eV/atom)	0.092009	0.109885	0.171058	0.226433	0.119779	0.143833	0.0489505
PR (d = 3) + GP	RMSE-P (GPa)	4.13455	3.5196	7.43528	3.46374	22.8707	8.28477	7.43833
	RMSE-E (eV/atom)	0.0223308	0.020542	0.102678	0.0354982	0.138062	0.0638221	0.0477875
PR (d = 4) + GP	RMSE-P (GPa)	9.12492	10.6907	91.6643	6.74059	62.0916	36.0624	34.6358
	RMSE-E (eV/atom)	0.00328862	0.0169377	0.14697	0.0366691	0.141565	0.069086	0.0623196
PR
PR (d = 1)	RMSE-P (GPa)	54.5597	64.6221	114.678	45.743	76.5446	71.2294	24.0296
	RMSE-E (eV/atom)	0.37664	0.444388	0.722352	0.294938	0.49471	0.466606	0.144398
PR (d = 2)	RMSE-P (GPa)	13.7179	14.1526	25.7831	26.7299	14.3487	18.9464	5.97962
	RMSE-E (eV/atom)	0.086083	0.127898	0.147567	0.228695	0.129178	0.143884	0.0469453
PR (d = 3)	RMSE-P (GPa)	4.72874	3.46709	7.45668	3.80228	22.9225	8.47546	7.3582
	RMSE-E (eV/atom)	0.0226544	0.020245	0.102715	0.0371772	0.138198	0.0641978	0.047639
PR (d = 4)	RMSE-P (GPa)	9.12492	10.6907	91.6643	6.72765	62.0911	36.0597	34.638
	RMSE-E (eV/atom)	0.00342347	0.0169377	0.146972	0.0366653	0.141563	0.0691123	0.0622917
semi-empirical/empirical EOS
Mie-Grüneisen-Debye + Birch Murnaghan	RMSE-P (GPa)	0.7984	39.394	2.727	2.757	3.2563	9.78654	14.8276
Mie-Grüneisen-Debye + Vinet	RMSE-P (GPa)	0.9582	21.076	2.4977	3.2241	3.4094	6.23308	7.4715
Mie-Grüneisen	RMSE-E (eV/atom)	0.240323	0.561445	0.949133	0.683585	0.561479	0.599193	0.228567

## Sheet: STable D4
Supplementary Table D4. Equation of state parameters used in the experiments with low P-T data as training data and the rest P-T data as testing data (refer to Figure 4 and Section "Supervised Joint Learning with P-V-T-E Data" in the main text). *Equation of state parameters were obtained with EOSFit7 software (Gonzalez-Platas et al. 2016). aIn region I, q was refined to a negative value, we fixe…
Parameters	region I	region II	region III	region IV
Mie-Grüneisen-Debye + 3rd-order Birch-Murnaghan equation*
V0 (cm3 mol-1)	3.2745	3.4031	3.485	3.4465
K0 (GPa)	438.403	433.468	415.747	441.794
K0'	3.7418	3.4275	3.6403	3.5707
θ0 (K)	298	298	3617.5	2580.26
γ	0.6189	1.0109	0.9958	1.0694
q	0.5000a	0.5455	0.4818	0.858
Mie-Grüneisen-Debye + Vinet equation*
V0 (cm3 mol-1)	3.3521	3.4081	3.4802	3.4489
K0 (GPa)	420.224	424.136	405.848	430.842
K0'	3.962	3.6953	3.8945	3.772
θ0 (K)	298	298	2807.03	2294.92
γ	0.7156	1.0124	0.9824	1.0562
q	0.5000a	0.5384	0.5635	0.8494

## Sheet: STable D5
Supplementary Table D5. Predicted pressure values by semi-empirical/empirical equations of state with low P-T data as training data and the rest P-T data as testing data (refer to Figure 4 and Section "Supervised Joint Learning with P-V-T-E Data" in the main text). The values were calculated using EOSFit7 software (Angel et al. 2014).
	Benedict et al. 2014	Mie-Grüneisen-Debye + Birch Murnaghan	Mie-Grüneisen-Debye + Vinet
	P_true (GPa)	P_predict (GPa)	P_predict (GPa)
region I	597.562	521.076	552.786
	673.838	594.347	627.647
	304.018	243.49	268.574
	92.6222	53.135	68.296
	544.258	465.528	497.762
	476.768	404.07	434.836
	313.087	248.939	274.801
	68.1514	30.969	45.325
	433.475	357.915	388.577
	322.163	254.389	281.029
	855.824	764.103	800.287
	627.306	545.003	580.127
	156.022	98.643	117.669
region II	597.562	543.267	563.592
	673.838	613.318	638.241
	544.258	499.914	516.289
	313.087	295.113	300.551
	68.1514	65.43	65.858
	433.475	405.348	415.388
	322.163	303.714	309.179
	855.824	775.047	811.359
	627.306	580.707	601.293
	156.022	144.962	145.788
region III	673.838	676.509	675.933
	433.475	433.503	433.098
	322.163	321.095	320.699
	855.824	860.94	857.929
	627.306	632.586	631.605
	156.022	149.893	149.217
region IV	855.824	852.457	852.003
	156.022	150.809	150.399

## Sheet: STable D6
Supplementary Table D6. Root mean square error of pressure (RMSE-P) and energy (RMSE-E) in the experiments with low P-T data as training data and the rest P-T data as testing data (refer to Figure 4 and Section "Supervised Joint Learning with P-V-T-E Data" in the main text).
Methods	Parameters	region I	region II	region III	region IV
EOSNN	RMSE-P (GPa)	35.1713	24.8755	14.4552	15.9203
	RMSE-E (eV/atom)	0.466111	0.458575	0.360148	0.134347
PR + Gaussian Process (GP d = 3)	RMSE-P (GPa)	173.119	240.407	11.8312	19.3958
	RMSE-E (eV/atom)	0.625952	0.251226	0.136959	0.0769944
PR (d = 3)	RMSE-P (GPa)	173.119	240.407	11.8312	19.3144
	RMSE-E (eV/atom)	0.625952	0.251226	0.136959	0.0776065
Mie-Grüneisen-Debye + Birch Murnaghan	RMSE-P (GPa)	69.6994	38.0867	2.7719	1.722
Mie-Grüneisen-Debye + Vinet	RMSE-P (GPa)	41.4938	25.7295	2.7548	2.1496
Mie-Grüneisen	RMSE-E (eV/atom)	1.33406	0.979273	0.959059	1.03545
